# Supplementary material
Source: publisher figshare collection journal article supplement (https://frontiersin.figshare.com/ndownloader/files/21021573)
Supplement: Supplementary file [file 21021573]

## Supplementary Material

### 1 Synthesis of the dyes

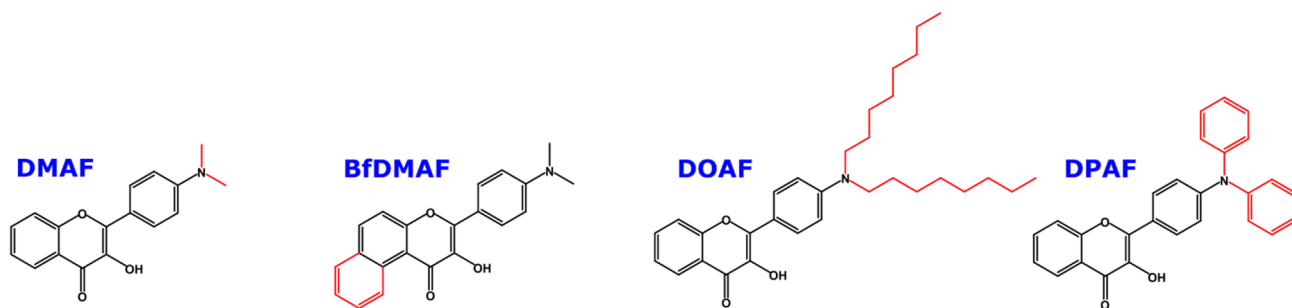

All four derivatives of 3-hydroxychromone were synthesized following a two-stage Algar-Flynn-Oyamada procedure modified for better performance with electron donor-substituted aldehydes [S1]. To 1 g of a N,N-disubstituted aminobenzaldehyde, 1 equiv. of 2-hydroxyacetophenone (or 2-hydroxynaphthophenone to obtain BfDMAF) was added in a 50 mL round-bottom flask, and the compounds were dissolved in 10 mL of DMF. Subsequently, 3 equiv. of sodium methylate were added, and the mixture was stirred at room temperature for 3 hours. After that, the mixture was transferred into a bigger flask and diluted with 50 mL of ethanol. An excess of 30 equiv. of sodium methoxide was then added, followed by an excess of 20 equiv. of hydrogen peroxide (30% v/v), that was added dropwise while stirring. Formation of the gel of the intermediate epoxide product was observed, which then dissolved upon further addition of  $\text{H}_2\text{O}_2$ . The mixture was subsequently refluxed for 2-3 minutes and left to cool down. After that, the reaction mixture was diluted with 50 mL of ultrapure water, and neutralized to pH 6-7. The product was filtered (extracted with chloroform in case of DOAF) and purified as indicated below. structures of the obtained compounds were confirmed by  $^1\text{H}$  NMR spectroscopy on a Bruker Advance 500 MHz NMR spectrometer at  $25^\circ\text{C}$ . Samples were analyzed in  $\text{DMSO-d}_6$  (99.9% D, Cambridge Isotope Laboratories). Data was processed in Mnova NMR (Escondido, CA).

**DMAF:** the crude product was recrystallized from methanol. Yield 0.71 g (35.5 %).  $^1\text{H}$  NMR (500 MHz,  $\text{DMSO-d}_6$ ): 3.01 (s, 6H), 6.84 (d, 2H), 7.42 (t, 1H), 7.73 (m, 2H), 8.07 (d, 1H), 8.12 (d, 2H), 9.16 (s, 1H).

**BfDMAF:** the crude product was recrystallized from methanol. Yield 0.92 g (41.5 %).  $^1\text{H}$  NMR (500 MHz,  $\text{DMSO-d}_6$ ): 3.02 (s, 6H), 6.87 (d, 2H), 7.66 (t, 1H), 7.77-7.85 (m, 2H), 8.08 (d, 1H), 8.16 (d, 2H), 8.27 (d, 1H), 9.23 (s, 1H), 10.01 (d, 1H).

**DOAF:** the crude product was purified by column chromatography (silica gel, chloroform). Yield 0.31 g (22.2 %).  $^1\text{H}$  NMR (500 MHz,  $\text{DMSO-d}_6$ ): 0.84 (t, 6H), 1.24-1.27 (m, 20H), 1.47 (m, 4H), 3.20 (t, 4H), 6.50 (t, 1H), 6.59 (d, 2H), 6.71 (d, 1H), 7.07 (t, 2H), 7.69 (d, 1H), 8.07 (d, 1H), 9.60 (s, 1H).

**DPAF:** the crude product was recrystallized from methanol. Yield 0.51 g (34.7 %).  $^1\text{H}$  NMR (500 MHz,  $\text{DMSO-d}_6$ ): 7.04 (d, 2H), 7.14 (m, 6H), 7.37 (m, 4H), 7.45 (t, 1H), 7.70 (d, 1H), 7.78 (t, 1H), 8.09 (t, 3H), 9.31 (s, broad, 1H).

## 2 Dye loading quantification

Dye loading quantification was performed using UV/vis absorption spectroscopy. Calibration graphs for all four dyes in DMSO were obtained (Supplementary Figure 1). After that, absorptions of dye-loaded NP solutions with known concentrations in DMSO were recorded, and the content of the dye in the dye-loaded NP samples were calculated (Supplementary Table 1). DMSO was used to ensure the disassembly of NPs in order to avoid dye aggregation affecting the calibration and quantification data.

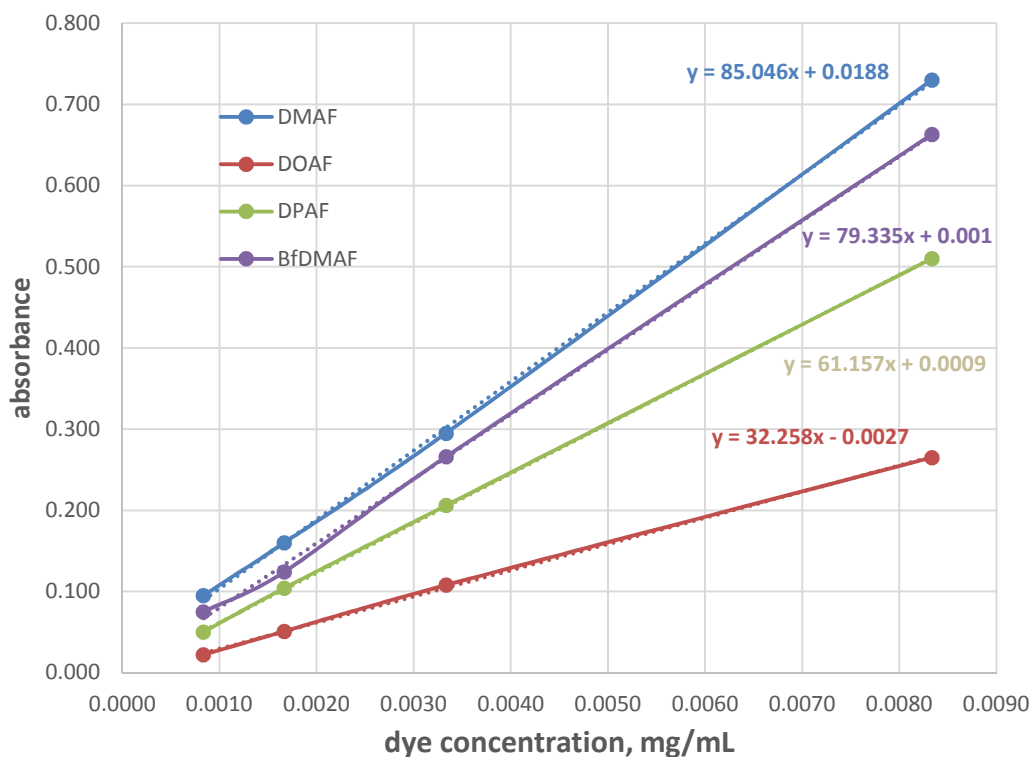

**Supplementary Figure 1.** Calibration data for the dye content quantification in the dye-loaded HA NPs ( $\lambda_{\text{abs}} = 400 \text{ nm}$ ).

**Supplementary Table 1.** Dye content in the dye-loaded NPs.

| Dye    | Content, % (w/w) |
|--------|------------------|
| DMAF   | 0.3              |
| BfDMAF | 2.6              |
| DOAF   | 1.3              |
| DPAF   | 0.7              |

### 3 Canonical score plots of the LDA results for the “one against the rest” analysis to predict the components of the unknown binary mixtures

Each canonical score plot represents an LDA treatment of the mixture’s response in comparison with the component under question (bacterial species that will be either confirmed or rejected as the mixture’s component), and the rest of bacterial species from the training dataset. LDA processing was performed using XLSTAT software [S2].

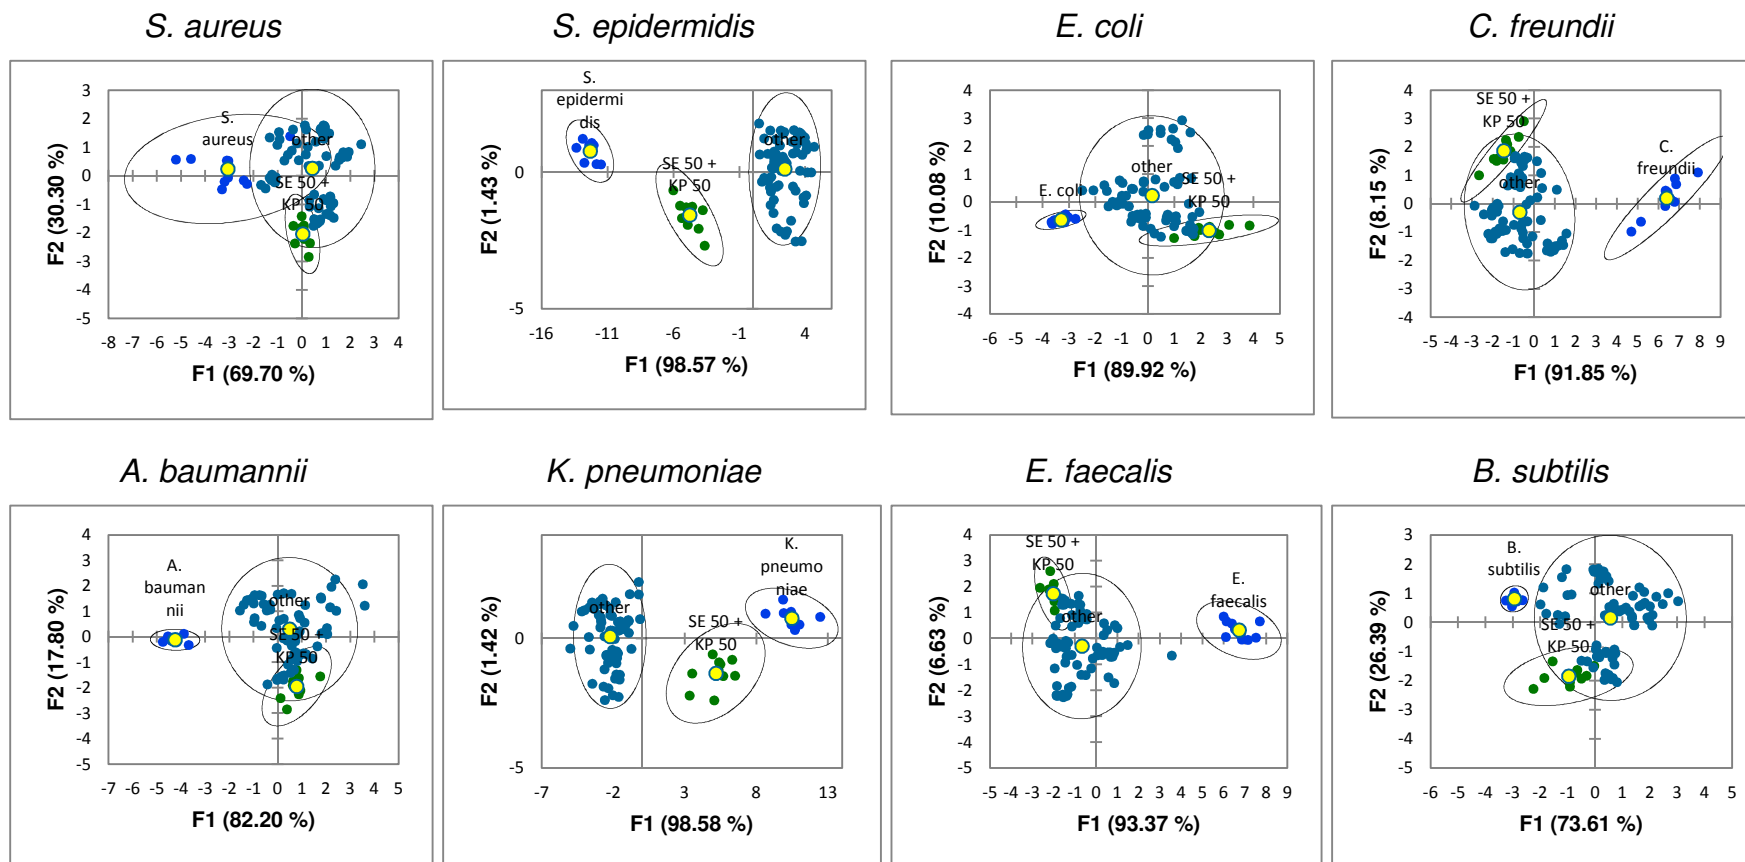

**Supplementary Figure 2.** Prediction of the components of the mixture of *S. epidermidis* and *K. pneumoniae* (50:50 v/v) using “one against the rest” approach in the linear discriminant analysis.

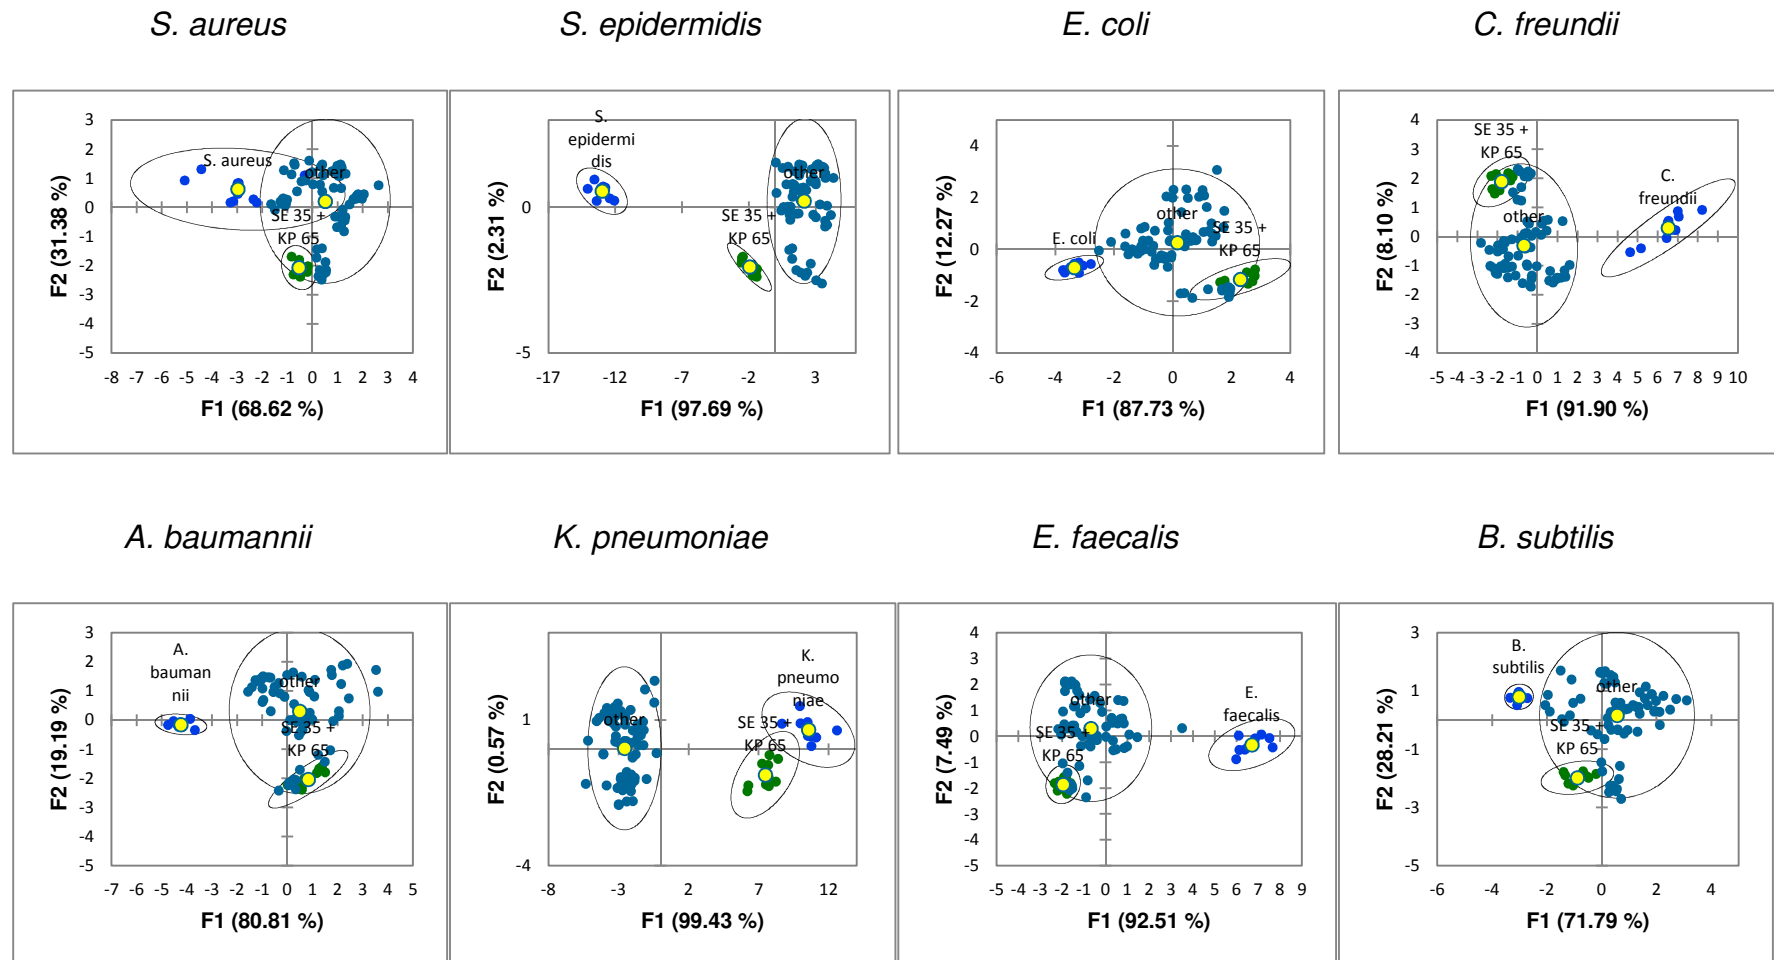

**Supplementary Figure 3.** Prediction of the components of the mixture of *S. epidermidis* and *K. pneumoniae* (35:65 v/v) using “one against the rest” approach in the linear discriminant analysis.

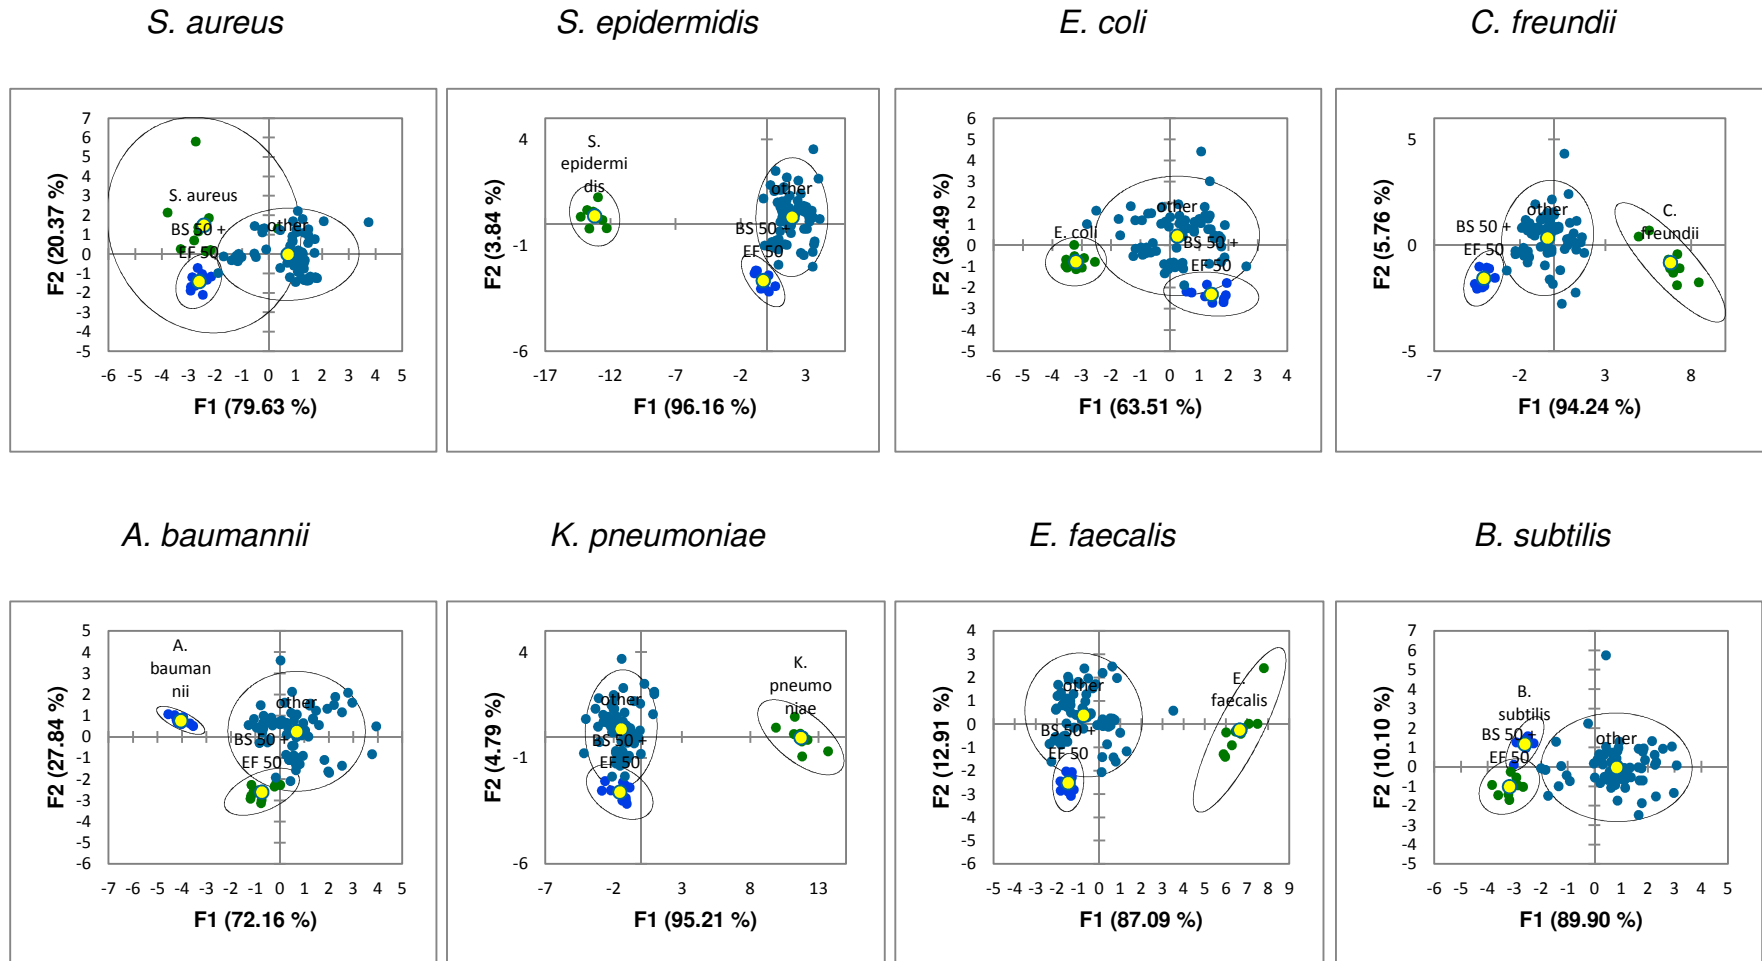

**Supplementary Figure 4.** Prediction of the components of the mixture of *B. subtilis* and *E. faecalis* (50:50 v/v) using “one against the rest” approach in the linear discriminant analysis.

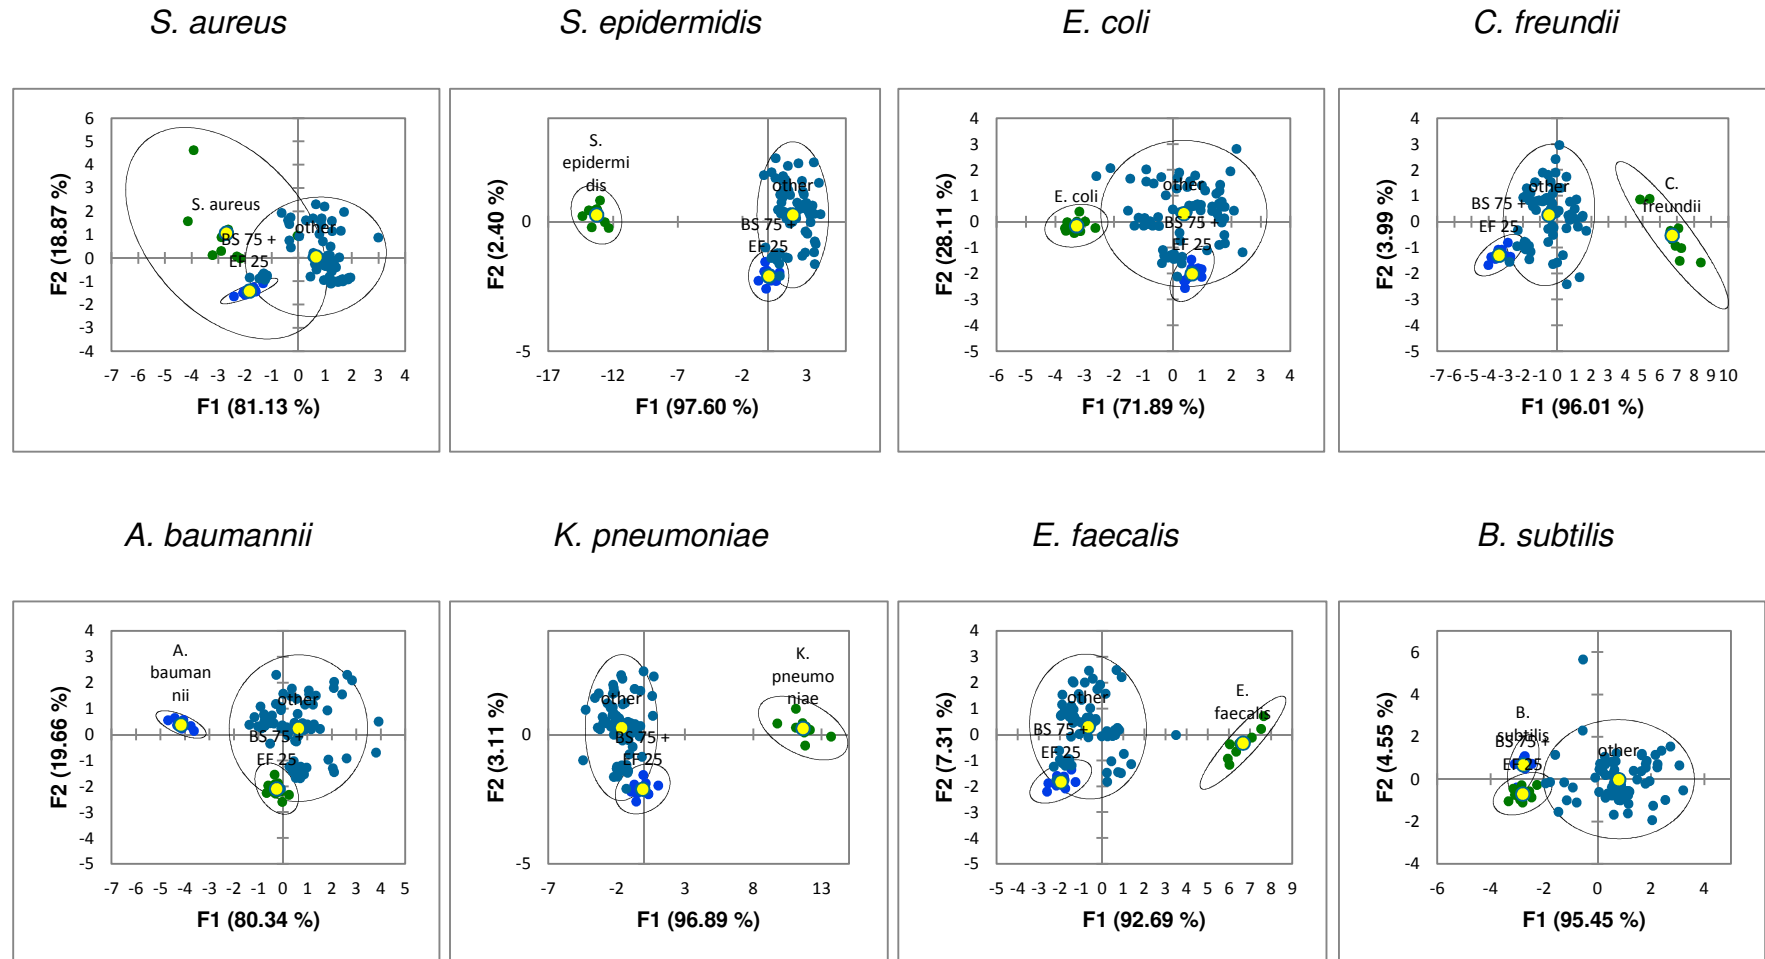

**Supplementary Figure 5.** Prediction of the components of the mixture of *B. subtilis* and *E. faecalis* (75:25 v/v) using “one against the rest” approach in the linear discriminant analysis.

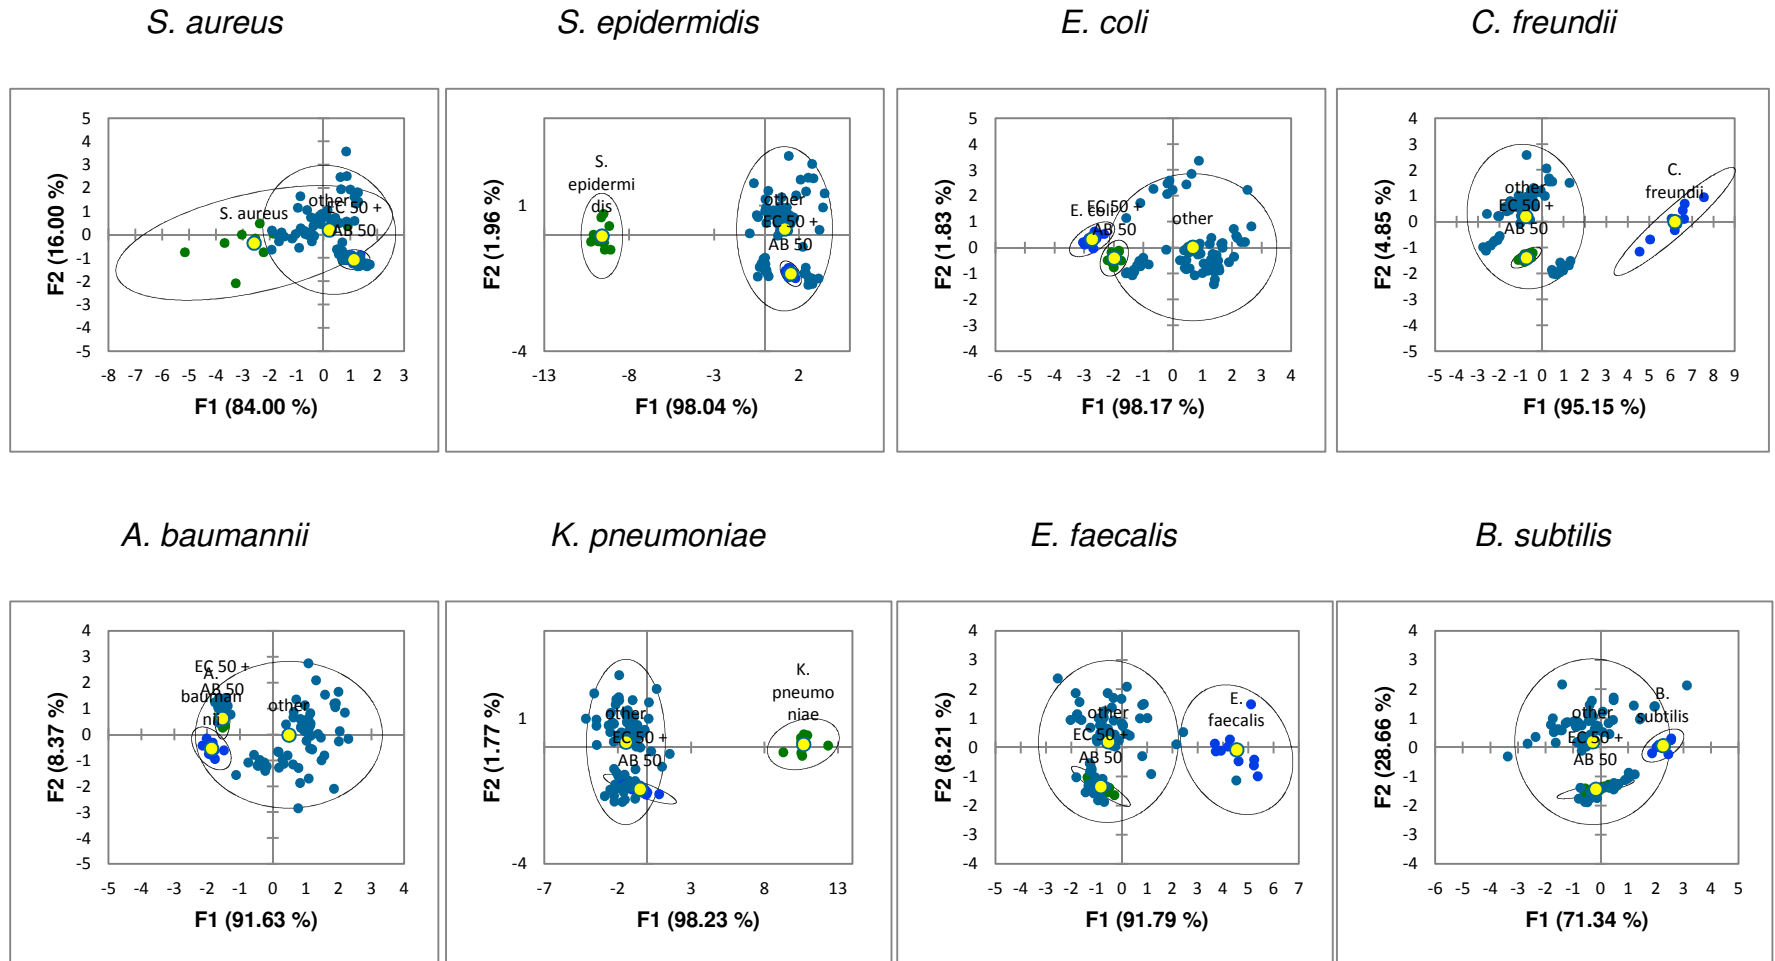

**Supplementary Figure 6.** Prediction of the components of the mixture of *E. coli* and *A. baumannii* (50:50 v/v) using “one against the rest” approach in the linear discriminant analysis.

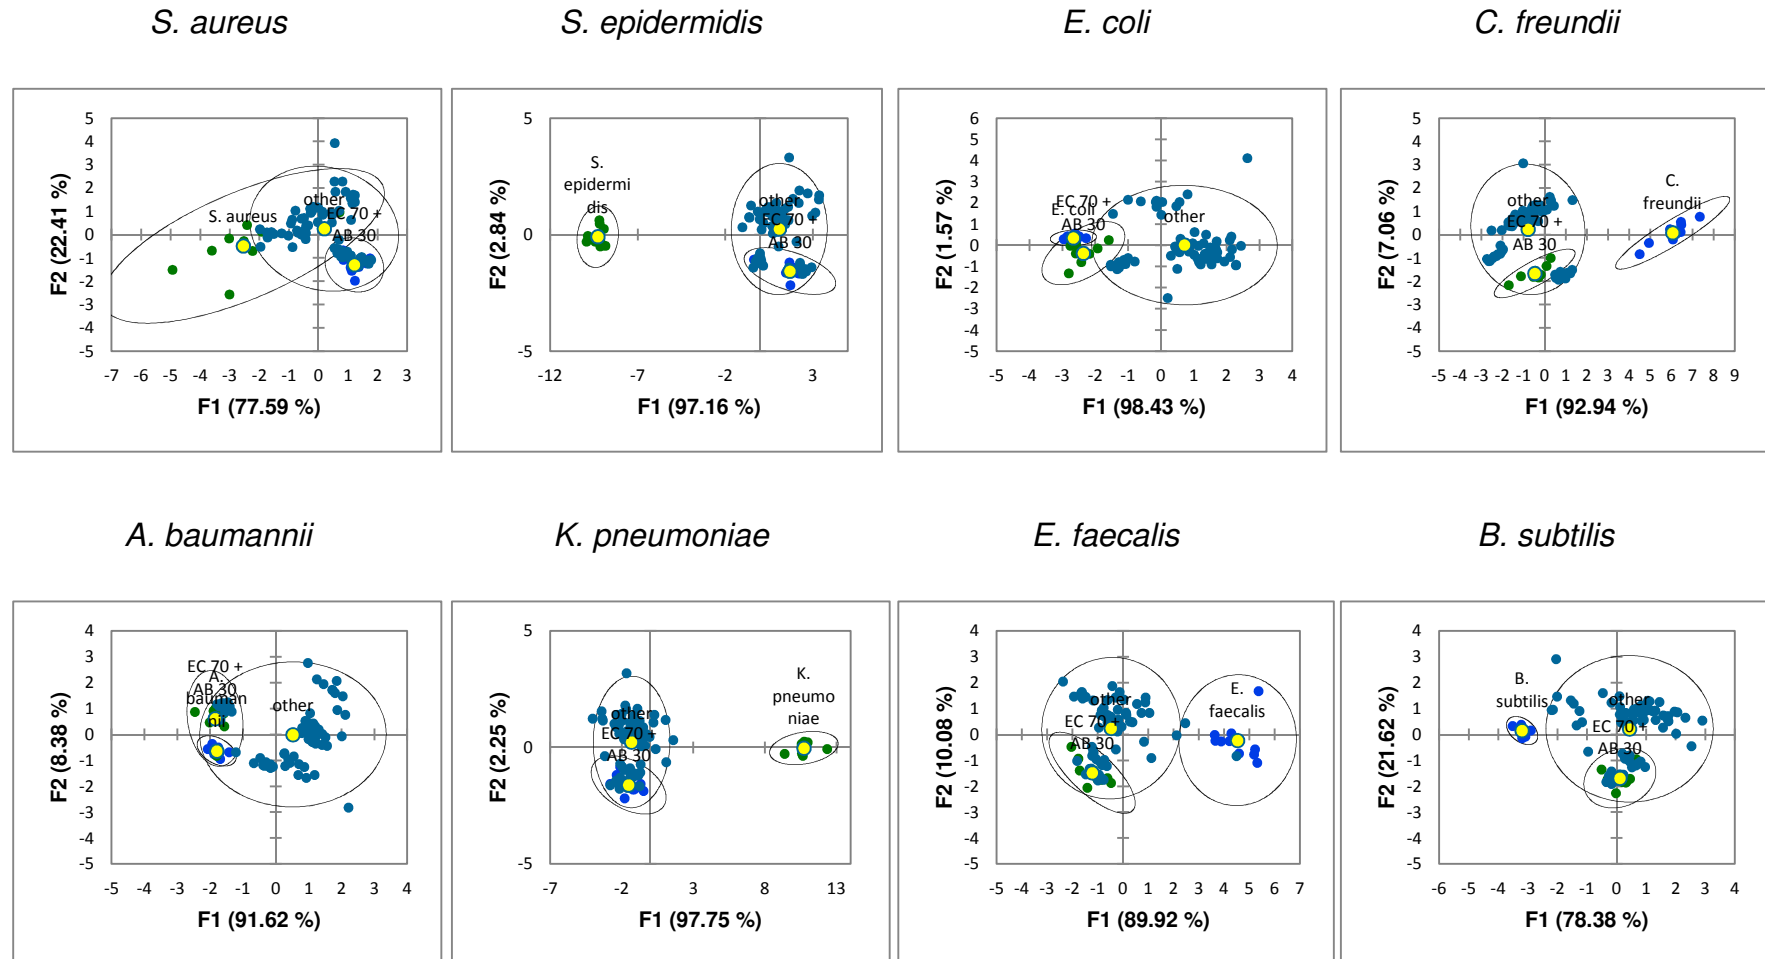

**Supplementary Figure 7.** Prediction of the components of the mixture of *E. coli* and *A. baumannii* (70:30 v/v) using “one against the rest” approach in the linear discriminant analysis.



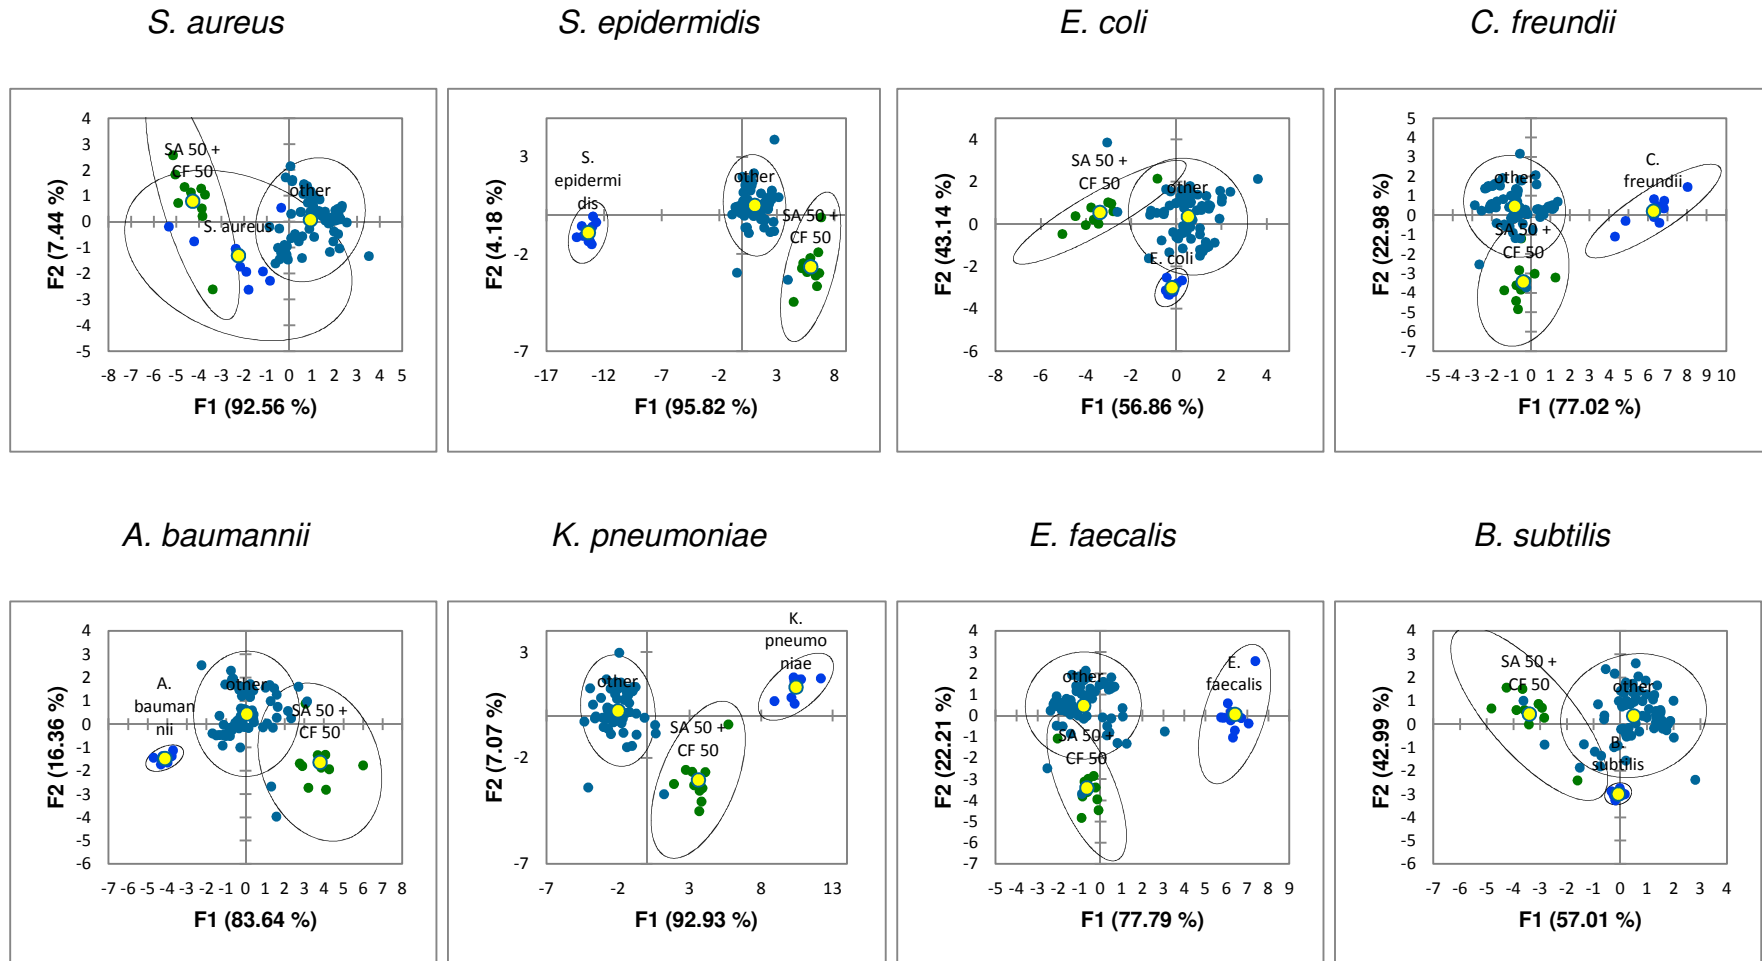

**Supplementary Figure 8.** Prediction of the components of the mixture of *S. aureus* and *C. freundii* (50:50 v/v) using “one against the rest” approach in the linear discriminant analysis.

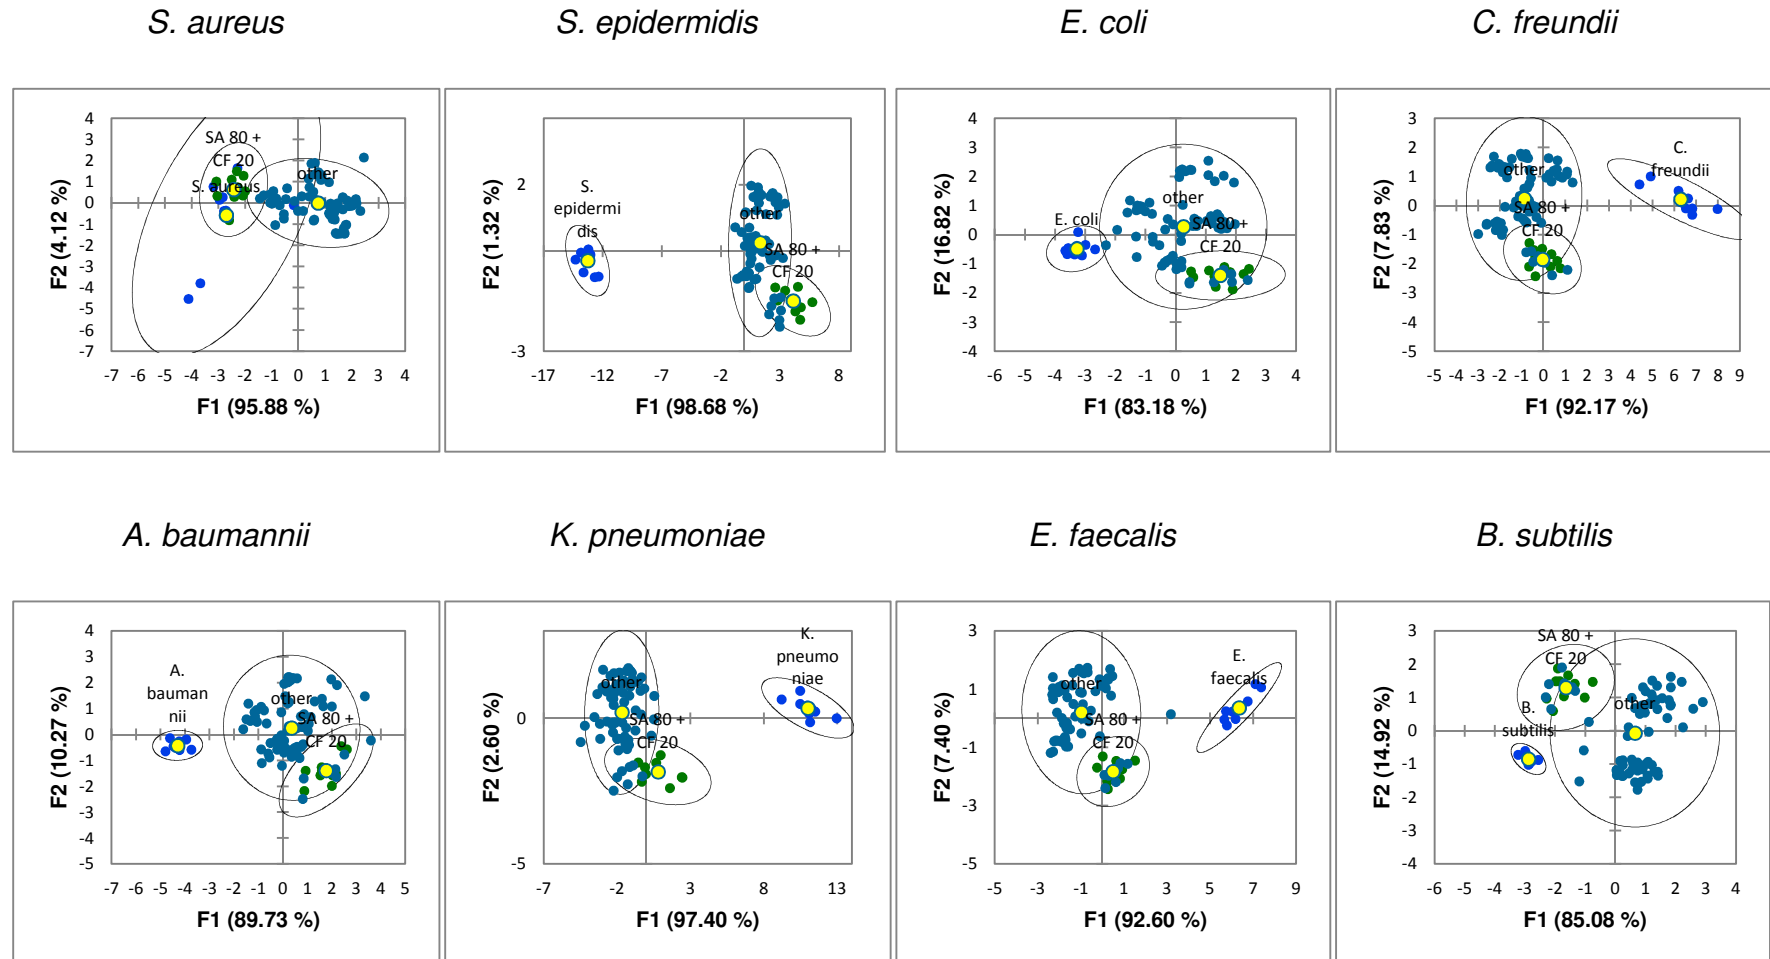

**Supplementary Figure 9.** Prediction of the components of the mixture of *S. aureus* and *C. freundii* (80:20 v/v) using “one against the rest” approach in the linear discriminant analysis.

| mixtures    | AB    | BS    | CF    | EC    | EF    | KP    | SA    | SE    | accuracy | hits  |       |
|-------------|-------|-------|-------|-------|-------|-------|-------|-------|----------|-------|-------|
| BS+EF 50-50 | 98.4% | 86.6% | 98.7% | 99.0% | 1.3%  | 99.3% | 98.4% | 93.7% | 84.4%    | 87.5% |       |
| BS+EF 75-25 | 98.4% | 86.9% | 98.5% | 99.0% | 1.6%  | 97.2% | 99.0% | 98.0% | 84.8%    | 87.5% |       |
| EC+AB 50-50 | 19.1% | 96.5% | 99.0% | 42.8% | 98.4% | 98.5% | 98.0% | 99.0% | 81.4%    | 81.3% |       |
| EC+AB 70-30 | 13.1% | 98.7% | 99.0% | 68.3% | 98.0% | 98.7% | 97.2% | 99.0% | 84.0%    | 87.5% |       |
| SA+CF 50-50 | 99.1% | 95.4% | 2.8%  | 97.4% | 98.9% | 97.8% | 90.7% | 99.8% | 85.2%    | 87.5% |       |
| SA+CF 80-20 | 99.0% | 96.4% | 1.2%  | 98.3% | 99.0% | 98.9% | 98.7% | 99.0% | 86.3%    | 87.5% |       |
| SE+KP 50-50 | 99.8% | 50.5% | 98.0% | 99.0% | 98.2% | 11.9% | 99.0% | 8.0%  | 70.6%    | 68.8% |       |
| SE+KP 35-65 | 99.1% | 78.1% | 98.0% | 99.0% | 98.0% | 49.7% | 99.0% | 3.0%  | 78.0%    | 81.3% |       |
|             |       |       |       |       |       |       |       |       | TOTAL    | 81.8% | 83.6% |

## References

- S1. *Klymchenko A. S., Pivovarenko V. G., Demchenko A. P.* Elimination of the Hydrogen Bonding Effect on the Solvatochromism of 3-Hydroxyflavones. *J. Phys. Chem. A* **107** (2003) 4211– 4216.
- S2. Addinsoft (2019). XLSTAT statistical and data analysis solution. Long Island, NY, USA. <https://www.xlstat.com>.
- S3. *Demsar J., Curk T., Erjavec A., Gorup C., Hocevar T., Milutinovic M., Mozina M., Polajnar M., Toplak M., Staric A., Stajdohar M., Umek L., Zagar L., Zbontar J., Zitnik M., Zupan B.* Orange: Data Mining Toolbox in Python. *J. Machine Learn. Res.* **14** (2013) 2349–2353.
